# Supplementary material for: Within-species phylogenetic relatedness of a common mycorrhizal fungus affects evenness in plant communities through effects on dominant species
Source: PubMed Central journal article supplement (PMC6248901; doi:10.1371/journal.pone.0198537), 2018-11-21

**Table A.** Coefficients of linear regressions between relative contribution of each plant species to total aboveground dry mass and plant community evenness.

**Table A**

| Plant species         | Coefficient | SE     | P-value |
|-----------------------|-------------|--------|---------|
| <i>A.elatius</i>      | 24.65       | 6.41   | <0.001  |
| <i>F.pratensis</i>    | -105.27     | -19.77 | <0.001  |
| <i>T.pratense</i>     | 48.94       | 5.69   | <0.001  |
| <i>L.corniculatus</i> | 15.19       | 2.38   | <0.001  |
| <i>K.arvensis</i>     | 11.25       | 1.49   | <0.001  |
| <i>P.vulgaris</i>     | 5.54        | 0.8    | <0.001  |

**Note:** Roots straining and colonization measurement protocol

The staining protocol was as follow, the roots of all species were rinsed with clean water and transfer in a 2ml tube that was filled with 10% KOH and heated at 90°C for 1h for the roots of *T. pratense*, *A. elatius*, *F. pratensis* and *P. vulgaris*, 45min for *K. arvensis* and 30 min for *L. corniculatus*. During the heating time the KOH was change at least three times. At the end of the heating time, the KOH was removed and HCL 1% was added for 3 to 5 minutes. Trypan blue solution was then added either for overnight staining or for a 2h staining at 90°C. The trypan blue was then removed and replaced by lactic acid at 80% for permanent conservation. Roots of each of the 900 plants were randomly spread on a petri dish previously marked with 100 cells of 4x4mm arranged in a grid pattern. The presence or absence of fungal structure was recorded on each cell containing a root and sums up to calculate the colonization level (%).

**Fig A.** Relationships between ADM responsiveness and AMF colonization rate for each of the six plant species. See main text for statistics

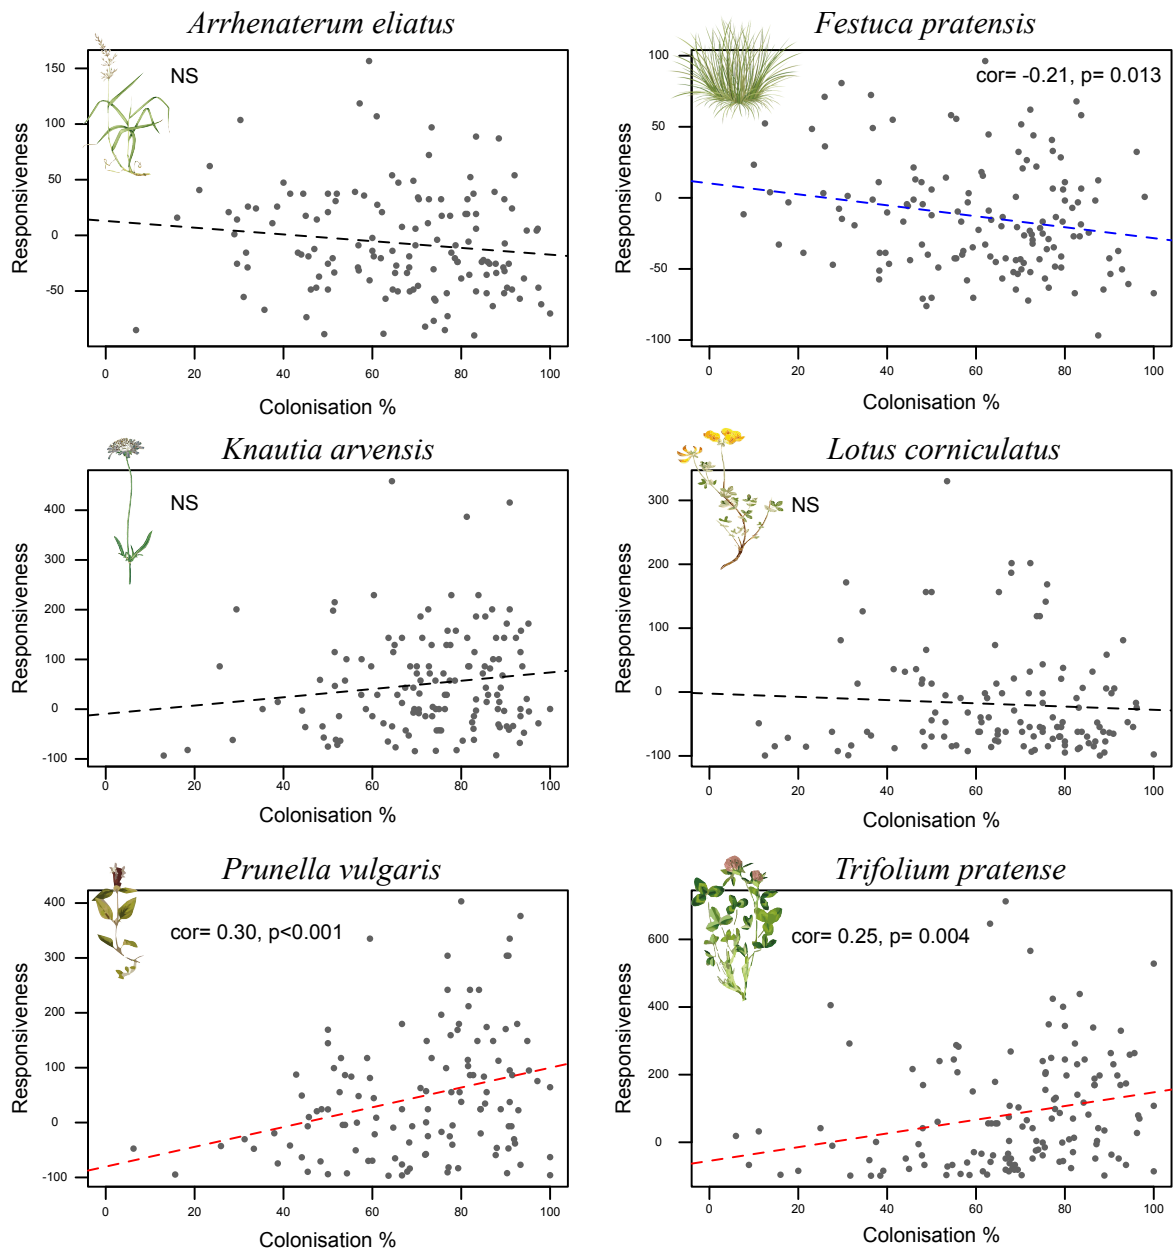

**Fig B.** Plant community metric for all the treatments and NM for **(1)** ADM and RDM, **(2)** mesocosm productivity (TDM) and **(3)** plant community evenness

1

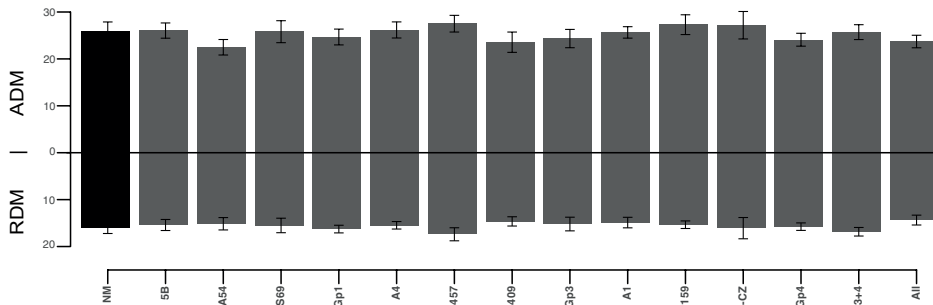

2

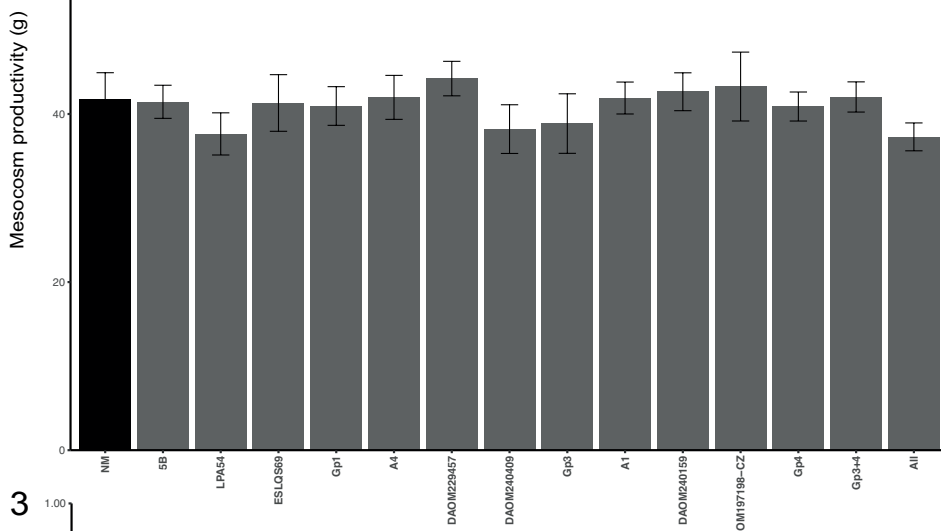

3

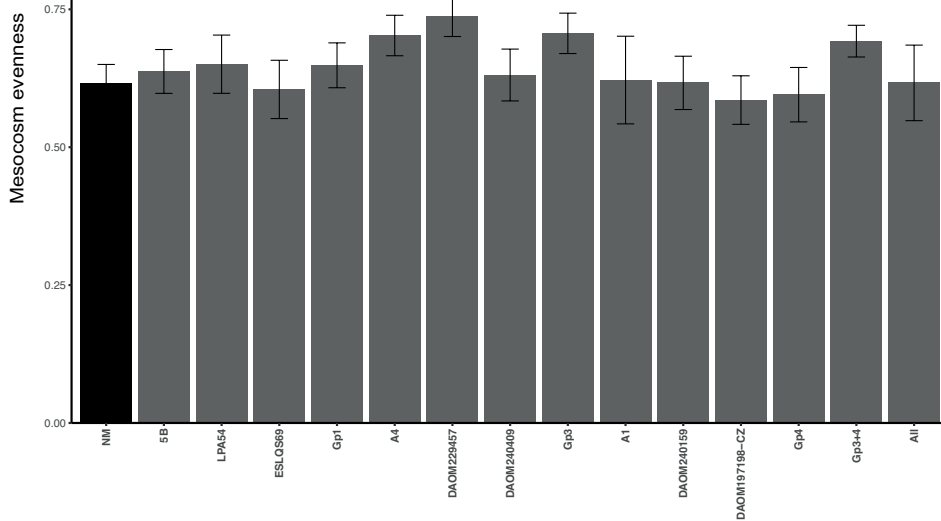

**Fig C.** Relationship between plant community evenness and mean colonization rate for each mesocosm. See main text for statistics.

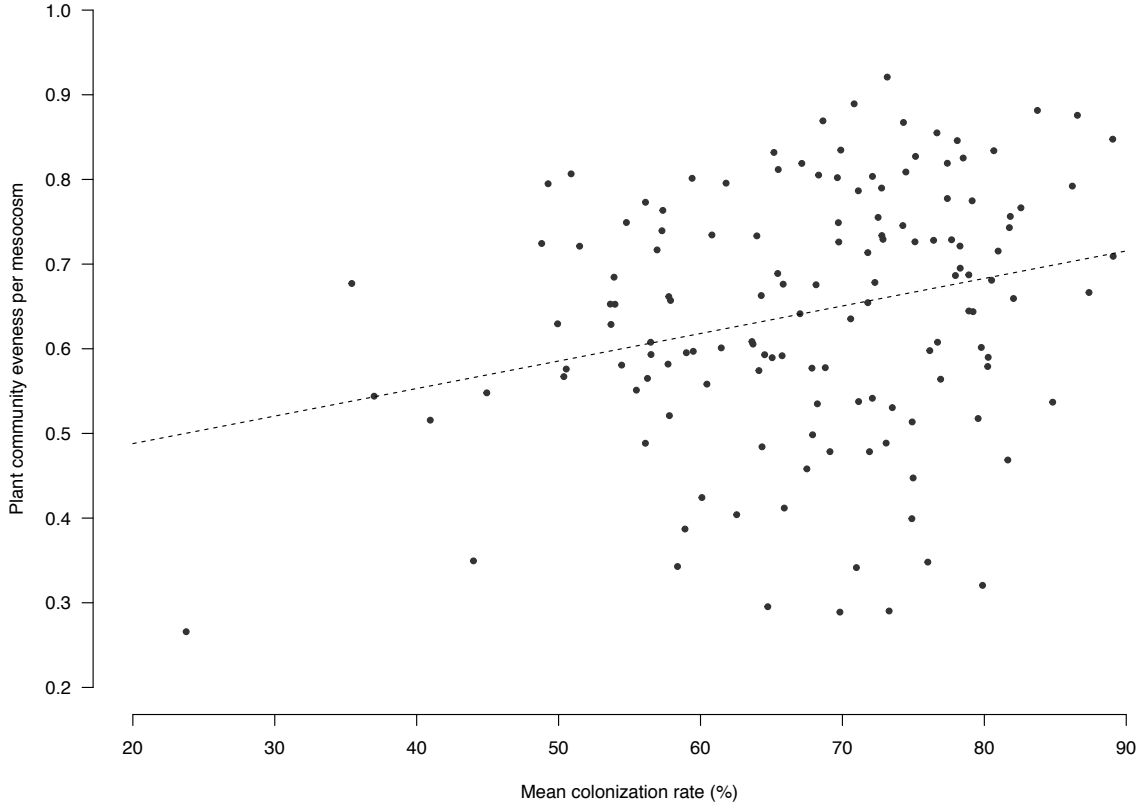

**Fig D.** Relationship between colonization evenness and mean colonization rate for each mesocosm.

See main text for statistics.

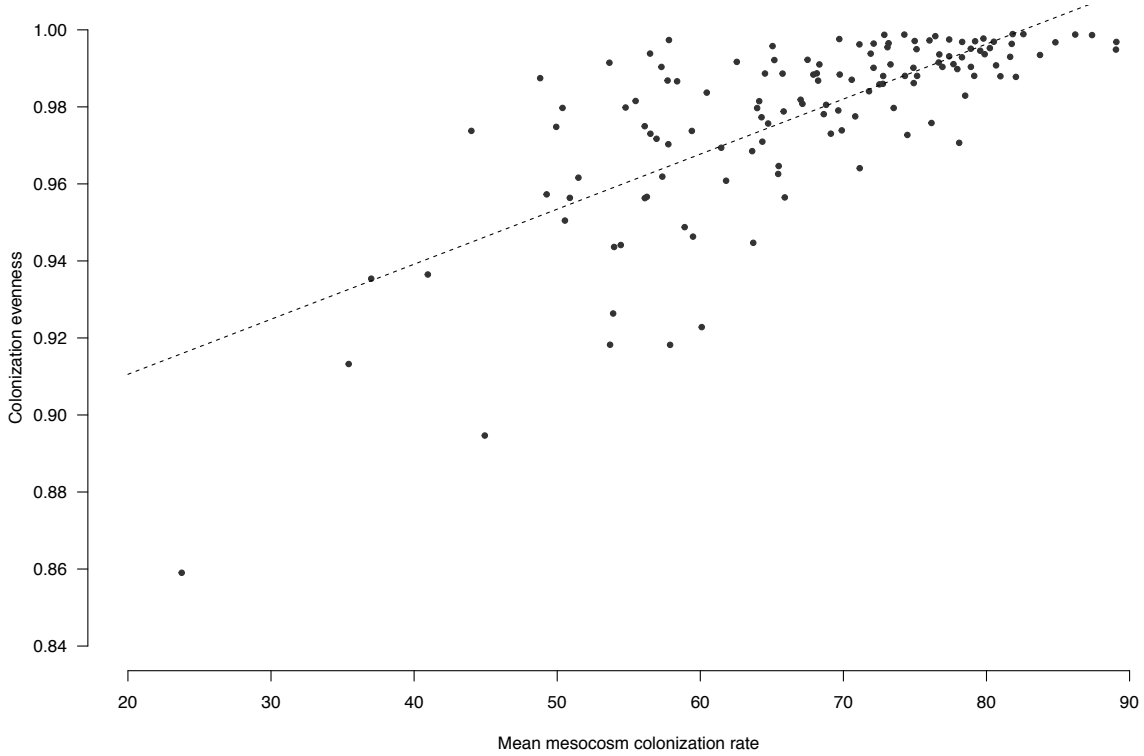

Supplement: pone.0198537.s003.pdf [file pone.0198537.s003.pdf]
